# Supplementary material for: BACH2 regulates T cell lineage states to overcome dysfunction driven by tonic CAR signaling
Source: Research Square preprint supplement (doi:10.21203/rs.3.rs-5845875/v1), 2025-01-24
Supplement: Supplementary file 1 [file b15d06a7ed4f36e721aa11f8.xlsx]

## Sheet: Sheet1
Supplementary Table 1
Target	Tag	Clone	Manufacturer	Catalog #
CD45	089Y	HI30	Fluidigm	3089003B
Ki-67	115In	8D5	Thermo	MA5-15690
CD3	141Pr	UCHT1	Fluidigm	3141019B
CD28	142Nd	CD28.2	biolegand	302902
CD45Ra	143Nd	H100	Fluidigm	3143006B
CD69	144Nd	FN50	Fluidigm	3144018B
CD4	145Nd	RPA-T4	Fluidigm	3145001B
CD8a	146Nd	RPA-T8	Fluidigm	3146001B
RORgt	147Sm	AFKJS-9	ebioscience	14-6988-82
CD278/ICOS	148Nd	C398.4A	Fluidigm	3148019B
CD56 (NCAM)	149Sm	NCAM16.2	Fluidigm	3155008B
CD223/LAG-3	150Nd	11C3C65	Fluidigm	3150030B
CD103	151Eu	Ber-ACT8	Fluidigm	3151011B
TCRgd	152Sm	11F2	Fluidigm	3152008B
CD62L	153Eu	DREG56	Fluidigm	3153004B
TIM3	154Sm	F38-2E2	Fluidigm	3154010B
CD27	155Gd	L128	Fluidigm	3158010B
CXCR3	156Gd	G025H7	Fluidigm	3156004B
CD134 (OX40)	158Gd	ACT35	Fluidigm	3158012B
CD197 (CCR7)	159Tb	G043H7	Fluidigm	3159003A
CD39	160Gd	A1	Fluidigm	3160004B
Tbet	161Dy	4B10	Fluidigm	3161014B
FoxP3	162Dy	PCH101	Fluidigm	3162011A
Eomes	163Dy	WD1928	ebioscience	14-4877-82
CD357 (GITR)	164Dy	621	biolegand	311602
CD45RO	165Ho	UCHL1	Fluidigm	3149001B
CD44	166Er	BJ18	Fluidigm	3166001B
Gata3	167Er	TWAJ	Fluidigm	3167007A
CD154 (CD40L)	168Er	24-31	Fluidigm	3168006B
CD25 (IL-2R)	169Tm	2A3	Fluidigm	3169003B
CTLA-4	170Er	14D3	Fluidigm	3170005B
Granzyme B	171Yb	GB11	Fluidigm	3171002B
CD38	172Yb	HIT2	Fluidigm	3172007B
CD137/4-1BB	173Yb	4B4-1	Fluidigm	3173015B
CD279 (PD-1)	174Yb	EH12.2H7	Fluidigm	3174020B
Perforin	175Lu	B-D48	Fluidigm	3175004B
CD127	176Yb	A019D5	Fluidigm	3176004B
TIGIT	209Bi	MBSA43	Fluidigm	3209013B
