# Supplementary material for: BACH2 regulates T cell lineage states to overcome dysfunction driven by tonic CAR signaling
Source: Research Square preprint supplement (doi:10.21203/rs.3.rs-5845875/v1), 2025-01-24
Supplement: Supplementary file 2 [file c7f3ce3b302368e099cb6294.xlsx]

## Sheet: Sheet1
Supplementary Table 2
Name	Fluorophore	Clone	Manufacturer	Catalog number
PD-1	PE/Cy7	EH12.1	BD pharmingen	561272
PD-1	PE-Cy5.5	J116	NOVUS biologicals	NBP1-43107PECY55
TIM-3	BV711	7D3	BD Horizon	565566
LAG-3	BV421	11C3C65	Biolegend	369314
BACH2	PE	16B10B53	Biolegend	695603
CD62L	PE-Cy7	Breg 56	BioLegend	304822
CD62L	BUV615	SK11	BD OptiBuild™	751364
CD45RO	BV711	UCHL1	BioLegend	304236
CD45RO	APC-Cy7	UCHL1	BioLegend	304227
TCF1	Alexa Fluor 647	S33-966	BD Pharmingen™	566693
EOMES	BUV395	X4-83	BD Horizon™	567171
KLRG1	PE-Fire 810	SA231A2	Biolegend	367733
Granzyme B	PE/Cy7	QA16A02	Biolegend	372214
CD39	BUV496	TU66	BD OptiBuild™	749969
CD4	BV605	OKT4	BioLegend	317438
CD8	BV650	RPA-T8	BD Horizon	563821
